# Supplementary material
Source: publisher figshare collection journal article supplement (https://brill.figshare.com/ndownloader/files/14478974)
Supplement: Supplementary file 1 [file 14478974]

Lecture 4

**Emotions I.: A cognitive linguistic theory**

**What are emotion metaphors, metonymies, and related concepts?**

*Metaphors:*

anger:

anger is hot fluid in a container: She is *boiling with* anger.

anger is fire: He’s doing a *slow burn.* His anger is *smoldering.*

anger is insanity: The man was *insane with* rage.

anger is an opponent in a struggle: I was *struggling with* my anger.

anger is a captive animal: He *unleashed* his anger.

anger is a burden: He *carries* his anger *around* with him.

the cause of anger is trespassing: Here *I draw the line*.

the cause of anger is physical annoyance: He's *a pain in the neck*.

anger is a natural force: It was a *stormy* meeting.

anger is a social superior: His actions were completely *governed* by anger.

love:

love is a nutrient: I am *starved for* love.

love is a journey: It's been *a long, bumpy road*.

love is a unity of parts: We're *as one*. They’re *breaking up*. We’re *inseparable.* We *fused together.*

love is a bond: There is a close *tie* between them.

love is a fluid in a container: She was *overflowing with* love.

love is fire: I am *burning* with love.

love is an economic exchange: I’m *putting more into* this than you are.

love is a natural force: She *swept* me *off my feet*.

love is a physical force: I was *magnetically drawn to* her.

love is an opponent: She tried to *fight* her feelings of love.

love is a captive animal: She *let go of* her feelings.

love is war: She *conquered* him.

love is insanity: I am *crazy about* you.

love is a social superior: She is completely *ruled by* love.

love is rapture / a high: I have been *high on* love for weeks.

the object of love is a small child: Well, *baby,* what are we gonna do?

the object of love is a deity: Don’t *put* her *on a pedestal.* He *worships* her.

*Metonymies:*

love:

increase in body heat stands for love: I *felt hot all over* when I saw her.

increase in heart rate stands for love: He’s a *heart-throb.*

blushing stands for love: She *blushed* when she saw him.

dizziness stands for love: She’s in a *daze* over him. I *feel dizzy* every time I see her.

sweaty palms stand for love: *His palms became sweaty* when he looked at her.

inability to breathe stands for love: You *take my breath away.*

interference with accurate perception stands for love: He *saw nothing but her.*

inability to think stands for love: He *can’t think straight* when around her.

physical closeness stands for love: They *are always together.*

intimate sexual behavior stands for love: She *showered* him *with kisses*. He *caressed* her gently.

sex stands for love: They *made love.*

loving visual behavior stands for love: He *can’t take his eyes off of* her. She’s *starry-eyed*

*Related concepts:*

liking, sexual desire, intimacy, longing, affection, caring, respect, and friendship.

**Is there a “master metaphor” for emotion?**

“force-dynamics” (Talmy, 1988).

Force entities:

Agonist

Antagonist

Intrinsic force tendency:

toward action

toward rest (inaction)

Resultant of the force interaction:

action

rest (inaction)

Balance of strengths:

the stronger entity

the weaker entity

(1) a cause leads to emotion and (2) emotion leads to some response.

causes are forces.

Emotion is an opponent.

He was *seized by* emotion.

He was *struggling with* his emotions.

I was *gripped by* emotion.

She was *overcome by* emotion.

**Table 1: emotion is an opponent**

| *Metaphorical mapping* | *Agonist’s force tendency* | *Antagonist’s force tendency* | *Resultant action* |
| --- | --- | --- | --- |
| *Source* | Opponent1  opponent1’s attempt to resist opponent2 | Opponent2  opponent2’s attempt to cause opponent1 to give in to his force | either opponent2 wins or opponent1 wins |
| *Target* | Rational self  self’s attempt to try to maintain control | Emotion  the emotion causing the self to lose control | self either loses or maintains control |

Table 2: emotion is a natural force

| *Metaphorical mapping* | *Agonist’s force tendency* | *Antagonist’s force tendency* | *Resultant action* |
| --- | --- | --- | --- |
| *Source* | Physical object  to keep being the same | Natural force  to cause an effect in physical object | physical object undergoes effect in a passive way |
| *Target* | Rational self  to continue to behave as before the emotion | Emotion  to cause the self to respond to emotion | self responds to the emotion in a passive way |

Emotion is a physical force:

emotion is a mechanical force; emotional effect is physical contact

When I found out, it *hit* me *hard*.

That was a terrible *blow*.

She *knocked* me *off my feet*.

emotion is a magnetic force

I was *magnetically drawn to* her.

I am *attracted to* her.

She found him *irresistible*.

That *repels* me.

Table 3: Emotion is a physical force

| *Metaphorical mapping* | *Agonist’s force tendency* | *Antagonist’s force tendency* | *Resultant action* |
| --- | --- | --- | --- |
| *Source* | Physical object  to remain unaffected by force | Physical force  to produce effect in object | object undergoes effect |
| *Target* | Self  to remain unemotional | Cause of emotion  to cause self to become emotional | self is emotional |

(1) cause of emotion—force tendency of the cause of emotion <--> rational self—force tendency of self

 (2) self has emotion

 (3) self’s force tendency <—> force tendency of emotion

 (4) self’s emotional response

# Are emotion metaphors unique to the emotions?

emotion is force.

pressurized container, opponent, natural force, burden, and so on.

pressurized container: “trouble *brewing*” or a “situation being *explosive.*”

opponent: “*struggling with* my emotions,” “*struggling with* differential equations.”

no emotion-specific conceptual metaphors.

morality and rational thought (see Kövecses, 2000).

trespassing, physical annoyance for anger;

hidden enemy, supernatural being for fear;

being off the ground, an animal that lives well, pleasurable physical sensation for happiness;

having no clothes on, decrease in size, blocking out the world for shame.

emotion is a cause of that emotion:

anger is trespassing

anger is physical annoyance

fear is a hidden enemy

fear is a supernatural being

a happy person is an animal that lives well

happiness is a pleasurable physical sensation

shame is having no clothes on

emotion is an effect of that emotion:

happiness is being off the ground

shame is a decrease in size

to be ashamed is to block out the world

# How do emotion metaphors differ from metaphors for relationships?

emotions are forces: human relationships, including love, friendship, and marriage?

Metaphorical systems:

for Communication (communication in friendship is sharing objects),

for Emotion (emotional intensity is temperature, emotional closeness is physical closeness),

for States and Relationships (states are objects, relationships are bonds, interactive relationships are economic exchanges),

for Complex Systems (abstract complex systems are buildings/ machines, etc.),

for Events (life is a journey),

for Positive/Negative Evaluation (desirable entities are valuable things).

Sharing (experience) objects

Distance (close/distant)

Warmth

Bond

Economic exchange

Building

Implement

Machine

Plant

Journey

Valuable commodity

sharing (experience) objects, bonds, and economic exchange characterizing interactive relationships,

building, implement, machine, and plant, characterizing complex abstract systems.

**What is the role of metaphors in the cognitive construction of particular emotion concepts?**

1. Offending event

Wrongdoer offends self.

Wrongdoer is at fault.

The offending event displeases self.

The intensity of the offense outweighs the intensity of the retribution (which equals zero at this point), thus creating an imbalance.

The offense causes anger to come into existence.

2. Anger

Anger exists.

Self experiences physiological effects (heat, pressure, agitation).

Anger exerts force on the self to attempt an act of retribution.

3. Attempt to control anger

Self exerts a counterforce in an attempt to control anger.

4. Loss of control

The intensity of anger goes above the limit.

Anger takes control of self.

S exhibits angry behavior (loss of judgment, aggressive actions).

There is damage to self.

There is danger to the target of anger, in this case, the wrongdoer.

5. Retribution

Self performs retributive act against wrongdoer (this is usually angry behavior).

The intensity of retribution balances the intensity of offense.

The intensity of anger drops to zero.

Anger ceases to exist.

King (1989) suggests that there are two prototypical cognitive models in Chinese:

1. Offending Event

Wrongdoer offends self.

The offending event displeases self.

The offense causes an imbalance in the body.

2. Anger

Anger exists.

Self experiences physiological effects (heat, pressure, agitation).

3. Attempt to control anger

Self exerts a counterforce in an attempt to control anger.

4. Release of anger

Self releases anger by exhibiting angry behavior.

5. Restoration of equilibrium

The amount of discharged anger balances the excess in the body.

The imbalance disappears and equilibrium is restored.

The other model differs from the one above in stages 4 and 5:

4. Diversion

The force of anger is diverted to various parts of the body.

Self exhibits somatic effects (headaches, stomachaches, etc.)

5. Compensating event

The compensating event pleases the self (this is usually sympathetic behavior directed at self).

The intensity of compensation balances the intensity of the offense.

The somatic effects of anger disappear.

Anger ceases to exist.

an ontological, a causal, and an expressive aspect.

(1) cause  (2) existence of anger, or its counterpart (in the form of a force)  (3) attempt at control  (4) loss of control  (5) expression

cause  existence of emotion (as forceful entity)  expression.

But how can metaphors create such a model?

the container with the substance (fluid or gas)  the person who is angry

the heat or pressure of the substance  the intensity of anger

the forceful substance in the container  the anger

trying to keep the forceful substance inside the container  trying to control the anger

the substance going out of the container  the involuntary expression of the anger

Zulu: anger is in the heart (Taylor and Mbense, 1998; Kövecses, 2000). anger (desire) is hunger and anger is a natural force (Taylor and Mbense, 1998).

we should take into account the possibly universal experiential basis of our emotion concepts, the conceptualization of this experiential basis by means of conceptual metonymies, the conceptual metaphors that often derive from these metonymies, and the broader cultural context.

**Are emotion concepts and emotion metaphors universal?**

How does variation come about if emotion concepts and metaphors are embodied in universal human experience?

*Variation as a result of differential framing*

She’s *burning with* desire.

I’ve got the *hots* for her.

He’s *on fire* for her.

The thing that is hot (from fire)  the lustful person

The heat  the lust

The degree of the heat  the intensity of the lustful feeling

Chagga lust is heat (Emanatian, 1995).

Nkeóka

“She roasts.”

Nékeha

“She burns.”

Náworé ’úshangu lo móro

“She has a ’heaven’ of fire.”

She has desirable sexual attributes (skills, natural endowments, interests)

Kyamúya rikó lilya

She’s cold.”

She lacks desirable sexual attributes.

Chagga sex is heat metaphor: differently framed.

the thing/substance burning  the woman with the desirable sexual qualities

warmth or heat of the thing/substance  desirable sexual qualities of a person

the person who observes the burning thing  the man who finds a woman sexually desirable

*Variation as a result of differential experiential focus*

English and Chinese anger.

Ilongot anger (Rosaldo, 1980): *liget* is a highly energized state. ‘energy/anger.’

Tsou (an Austronesian language spoken in parts of Taiwan): anger is excess air or fire in a container.

*Variation as a result of differential experiential focus through time*

conceptualization of anger changed considerably from the Old English to the Middle English.

universal physiology provides only a *potential* basis for metaphorical conceptualization.

**Conclusions**

emotion metaphors fall under the generic-level metaphor: causes are forces: emotions are forces.

hierarchical organization for how we make use of metaphorical conceptualization: generic to specific within a single hierarchy (which seems to be the case for emotion); generic to specific in a number of different hierarchies (which seems to be the case for friendship).

a large amount of nonuniversality in the metaphorical conceptualization of emotion. This is because either the framing or the experiential focus of the source domains may vary from culture to culture.

**References**

Baxter, L.A. 1992. Root metaphors in accounts of developing romantic relationships, *J. Social and Personal Relationships*, 9, 253-275.

Emanatian, Michelle. 1995. Metaphor and the expression of emotion: The value of cross-cultural perspectives. *Metaphor and Symbolic Activity 10:* 163-182.

Geeraerts, Dirk and Stefan Grondelaers. 1995. Looking back at anger: Cultural traditions and metaphorical patterns. In J. Taylor and R. MacLaury, eds., *Language and the Cognitive Construal of the World.* 153-179. Berlin: Gruyter.

Gevaert, Caroline. 2001. Anger in Old and Middle English: a 'hot' topic? *Belgian Essays on Language and Literature*. 89-101.

Gevaert, Caroline. 2001. The anger is heat question: Detecting cultural influence on the conceptualization of anger through diachronic corpus analysis. Proceedings of the SLE meeting.

Huang, Shuanfan. 2002. Tsou is different: A cognitive perspective on language, emotion, and body. *Cognitive Linguistics* 13-2, 167-186.

King, Brian. 1989. *The Conceptual Structure of Emotional Experience in Chinese.* Ph.D. diss., Ohio State University.

Kövecses, Zoltán. 1986. *Metaphors of Anger, Pride, and Love: A Lexical Approach to the Study of Concepts.* Amsterdam: Benjamins.

Kövecses, Zoltán. 1988. *The Language of Love: The Semantics of Passion in Conversational English.* Lewisburg, Pa.: Bucknell University Press.

Kövecses, Zoltán. 1990. *Emotion Concepts.* Berlin and New York: Springer-Verlag.

Kövecses, Zoltán. 1991. A linguist’s quest for love. *Journal of Social and Personal Relationships,* 8: 77-97.

Kövecses, Zoltán. 1994. Tocqueville’s passionate “beast”: A linguistic analysis of American democracy. *Metaphor and Symbolic Activity,* 9(2): 113-133.

Kövecses, Zoltán. 1995a. American friendship and the scope of metaphor. *Cognitive Linguistics 6,* 315-346.

Kövecses, Zoltán. 1995b. Anger: Its language, conceptualization, and physiology in the light of cross-cultural evidence. In J. R. Taylor and R. MacLaury (eds.) *Language and the Cognitive Construal of the World,* 181-196. Berlin: Mouton.

Kövecses, Zoltán. 1999. Does metaphor reflect or consitute cultural models? In R. Gibbs and G. Steen, eds., *Metaphor in Cognitive Linguistics.* 167-188. Amsterdam: John Benjamins.

Kövecses, Zoltán. 2000a. The scope of metaphor. In A. Barcelona, ed., *Metaphor and Metonymy at the Crossroads.* 79-92. Berlin: Mouton.

Kövecses, Zoltán. 2000b. *Metaphor and Emotion.* New York and Cambridge: Cambridge University Press.

Kövecses, Zoltán and Günter Radden. 1998. Metonymy: developing a cognitive linguistic view. *Cognitive Linguistics* 9-7, 37-77.

Lakoff, George. 1987. *Women, Fire, and Dangerous Things. What Categories Reveal about the Mind.* Chicago: The Univesity of Chicago Press.

Lakoff, George. 1990. The invariance hypothesis: Is abstract reason based on image schemas? *Cognitive Linguistics,* 1: 39-74.

Lakoff, George and Mark Johnson, 1980. *Metaphors We Live By.* Chicago: The University of Chicago Press.

Lakoff, George and Zoltán Kövecses, 1987. The cognitive model of anger inherent in American English. In D. Holland and N. Quinn, eds. *Cultural Models in Language and Thought.* 195-221. Cambridge: Cambridge University Press.

Matsuki, Keiko. 1995. Metaphors of anger in Japanese. In J. R. Taylor and R. MacLaury (eds.) *Language and the Cognitive Construal of the World,* 137-151. Berlin: Mouton.

Quinn, Naomi. 1991. The cultural basis of metaphor. In J. Fernandez, ed., *Beyond Metaphor. The Theory of Tropes in Anthropology.* 56-93. Stanford: Stanford University Press.

Rosaldo, Michelle. 1980. *Knowledge and Passion: Ilongot Notions of Self and Social Life.* Cambridge: Cambridge University Press.

Talmy, Leonard. 1988. Force Dynamics in Language and Cognition. *Cognitive Science* 12, 49-100.

Taylor, John and Thandi Mbense. 1998. Red dogs and rotten mealies: How Zulus talk about anger. In A. Athanasiadou and E. Tabakowska, eds., *Speaking of Emotions: Conceptualization and Expression.* 191-226. Berlin: Mouton.

Yu, Ning. 1995. Metaphorical expression of anger and happiness in English and Chinese. *Metaphor and Symbolic Activity 10:* 223-245.

Yu, Ning. 1998. *The Contemporary Theory of Metaphor. A Perspective from Chinese.* Amsterdam: John Benjamins.
